# Supplementary material for: Metagenomic and Metaproteomic Insights into Photoautotrophic and Heterotrophic Interactions in a Synechococcus Culture
Source: PubMed Central journal article supplement (PMC7029141; doi:10.1128/mbio.03261-19), 2020-02-18

**Figure S6**

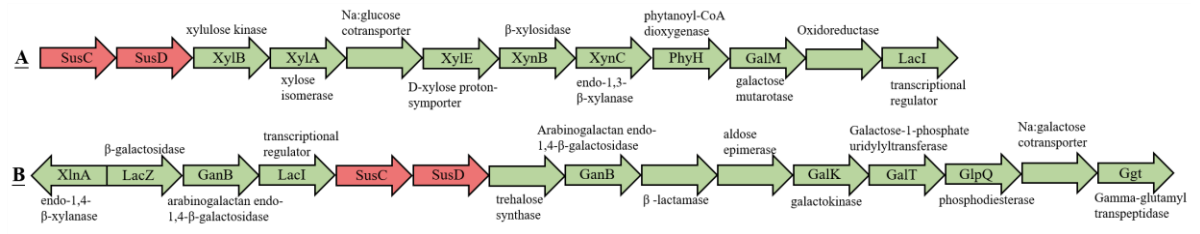

Supplement: mBio.03261-19-sf006.pdf [file mBio.03261-19-sf006.pdf]
